# Supplementary material for: Pattern, preferences, barriers, and correlates of self-reported physical activity in adults with borderline personality disorder: An online survey in western countries
Source: bioRxiv or medRxiv preprint supplement (doi:10.1101/2022.05.24.22275513), 2024-01-18

# Supplementary material

## Table of Content

|                                                                                                                             |           |
|-----------------------------------------------------------------------------------------------------------------------------|-----------|
| <i>Figure S1: physical activity level according to body mass index, sex, level of education, age, and country.....</i>      | <i>1</i>  |
| <i>Figure S2: Self-efficacy to do physical activity when encountering barrier according to age and education level.....</i> | <i>2</i>  |
| <i>Figure S3: Self-efficacy to do physical activity when encountering barrier according to education level.....</i>         | <i>3</i>  |
| <i>Figure S4: Self-efficacy to do physical activity when encountering barrier according to sex ...</i>                      | <i>4</i>  |
| <i>Figure S5: Self-efficacy to do physical activity when encountering barrier according to body mass index .....</i>        | <i>5</i>  |
| <i>Figure S6: Self-efficacy to do physical activity when encountering barrier according to country.....</i>                 | <i>6</i>  |
| <i>Figure S7: Physical activity preferences according to body mass index .....</i>                                          | <i>7</i>  |
| <i>Figure S8: Physical activity preferences according to sex.....</i>                                                       | <i>8</i>  |
| <i>Figure S9: Physical activity preferences according to country.....</i>                                                   | <i>9</i>  |
| <i>Figure S10: Physical activity preferences according to education level .....</i>                                         | <i>10</i> |
| <i>Figure S11: Physical activity preferences according to age .....</i>                                                     | <i>11</i> |

Figure S1: physical activity level according to body mass index, sex, level of education, age, and country

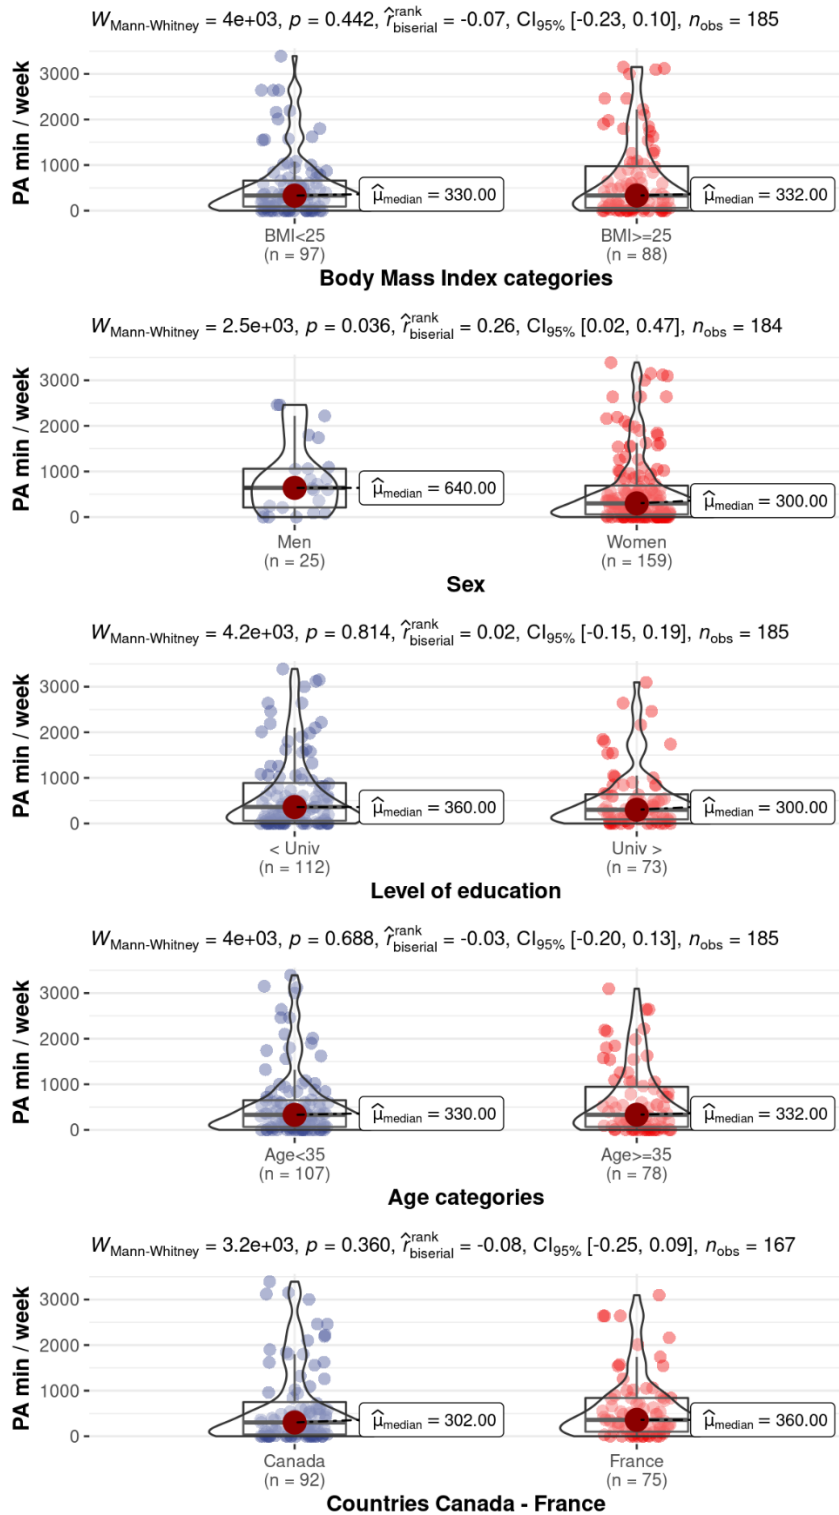

Note : PA = Physical activity.

Figure S2: Self-efficacy to do physical activity when encountering barrier according to age and education level

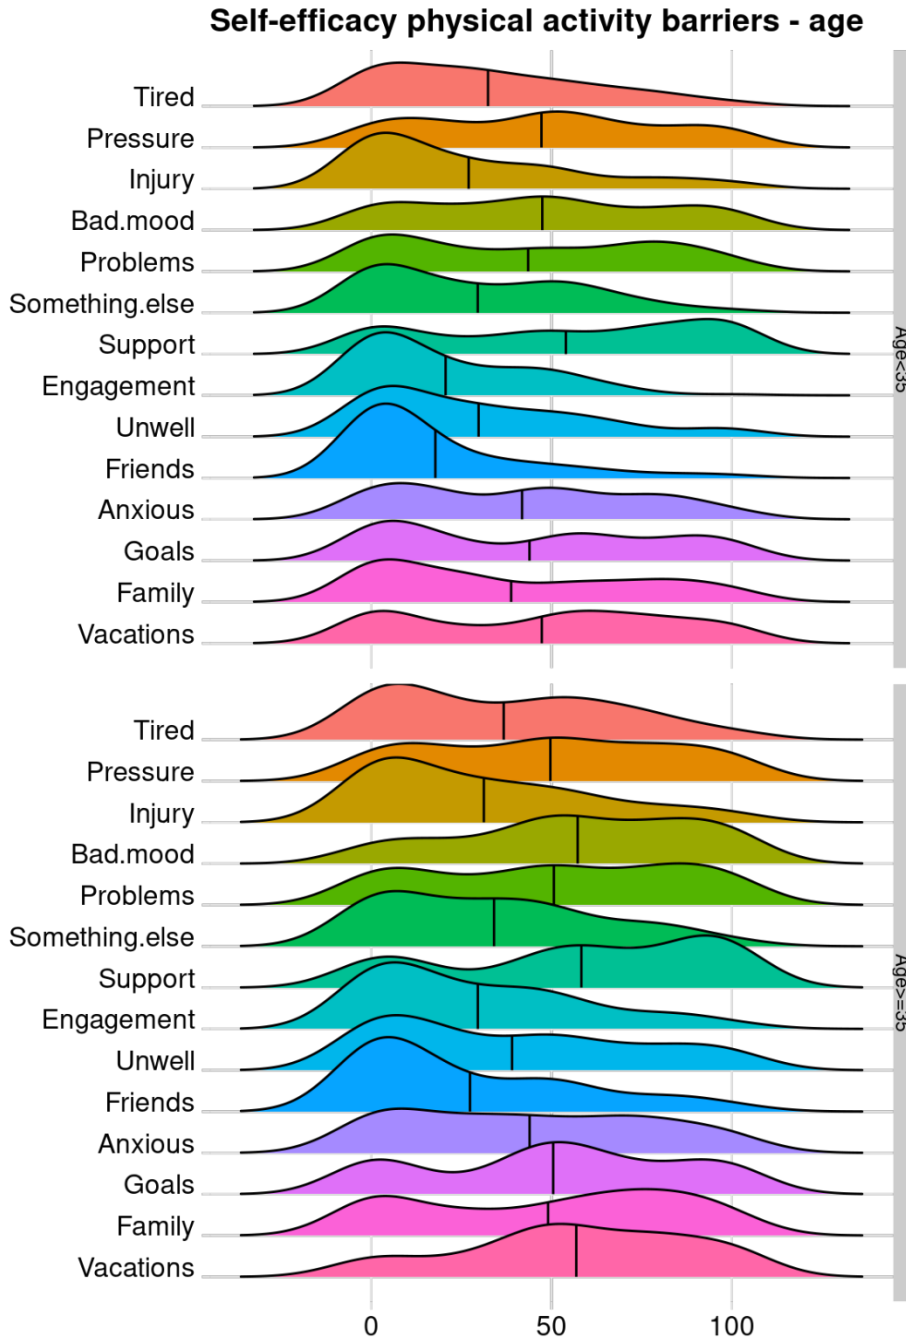

Note: The lower the mean indicator (vertical black line), the greater the barrier. The barriers in order from the top are: “Being tired”, “Feeling pressure at work”, “Recovering from an injury”, “Being in a bad mood”, “Having personal problems”, “Having more interesting things to do”, “Without the support of friends or family”, “Having other engagement”, “Feeling unwell”, “Having friends at home”, “Feeling anxious”, “Not reaching previously fixed training goals”, “Having family problems”, “During vacations”.

Figure S3: Self-efficacy to do physical activity when encountering barrier according to education level

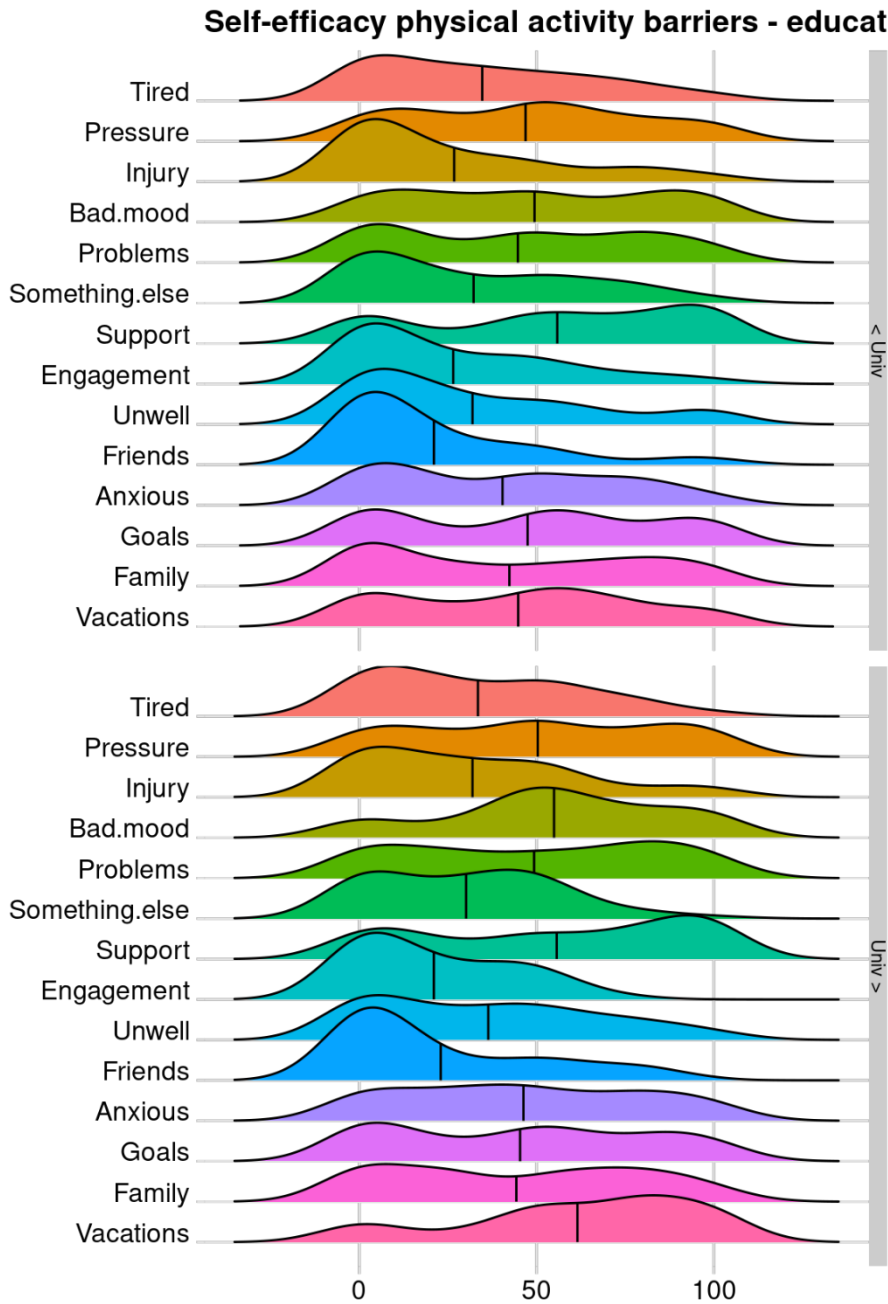

Note: The lower the mean indicator (vertical black line), the greater the barrier. The barriers in order from the top are: “Being tired”, “Feeling pressure at work”, “Recovering from an injury”, “Being in a bad mood”, “Having personal problems”, “Having more interesting things to do”, “Without the support of friends or family”, “Having other engagement”, “Feeling unwell”, “Having friends at home”, “Feeling anxious”, “Not reaching previously fixed training goals”, “Having family problems”, “During vacations”.

Figure S4: Self-efficacy to do physical activity when encountering barrier according to sex

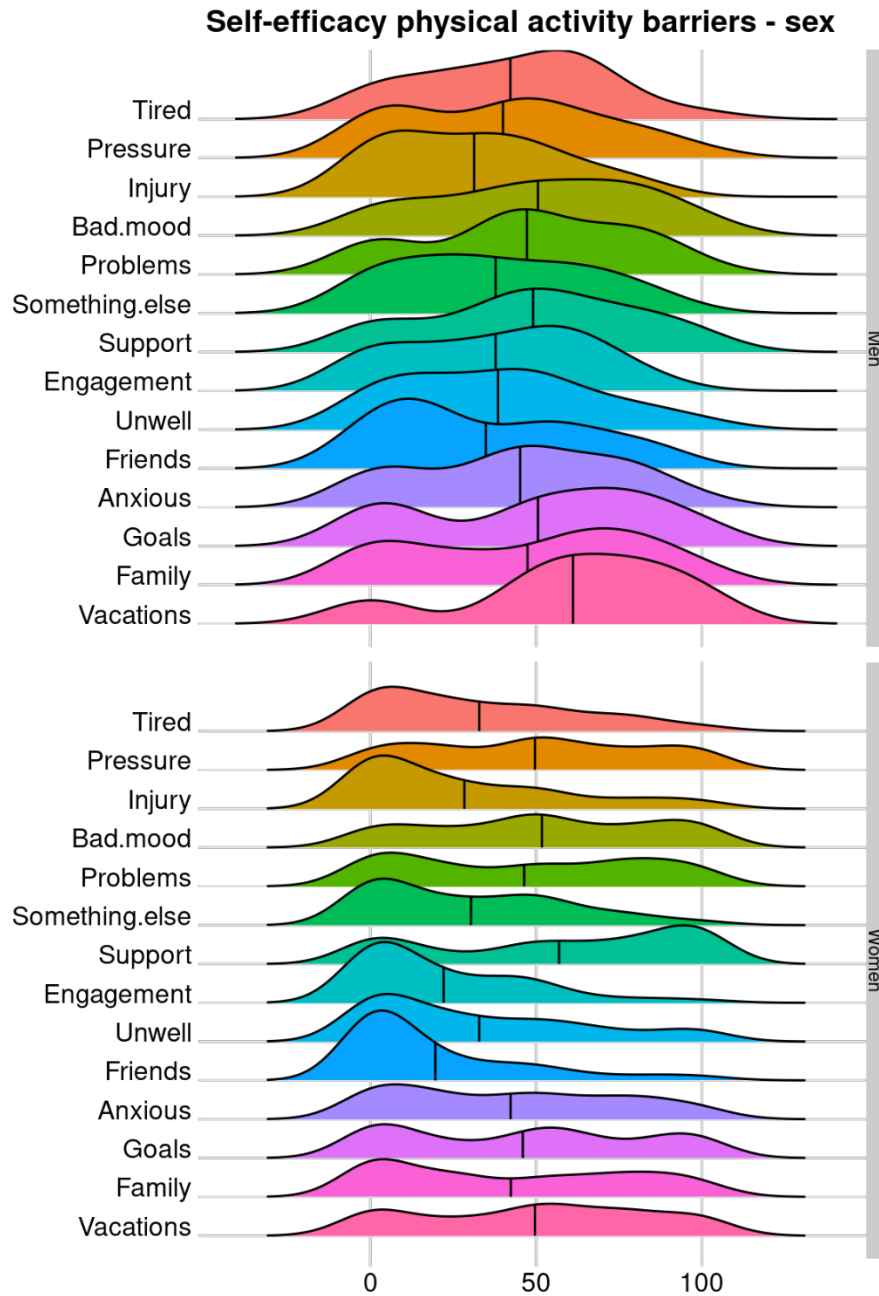

Note: The lower the mean indicator (vertical black line), the greater the barrier. The barriers in order from the top are: “Being tired”, “Feeling pressure at work”, “Recovering from an injury”, “Being in a bad mood”, “Having personal problems”, “Having more interesting things to do”, “Without the support of friends or family”, “Having other engagement”, “Feeling unwell”, “Having friends at home”, “Feeling anxious”, “Not reaching previously fixed training goals”, “Having family problems”, “During vacations”.

Figure S5: Self-efficacy to do physical activity when encountering barrier according to body mass index

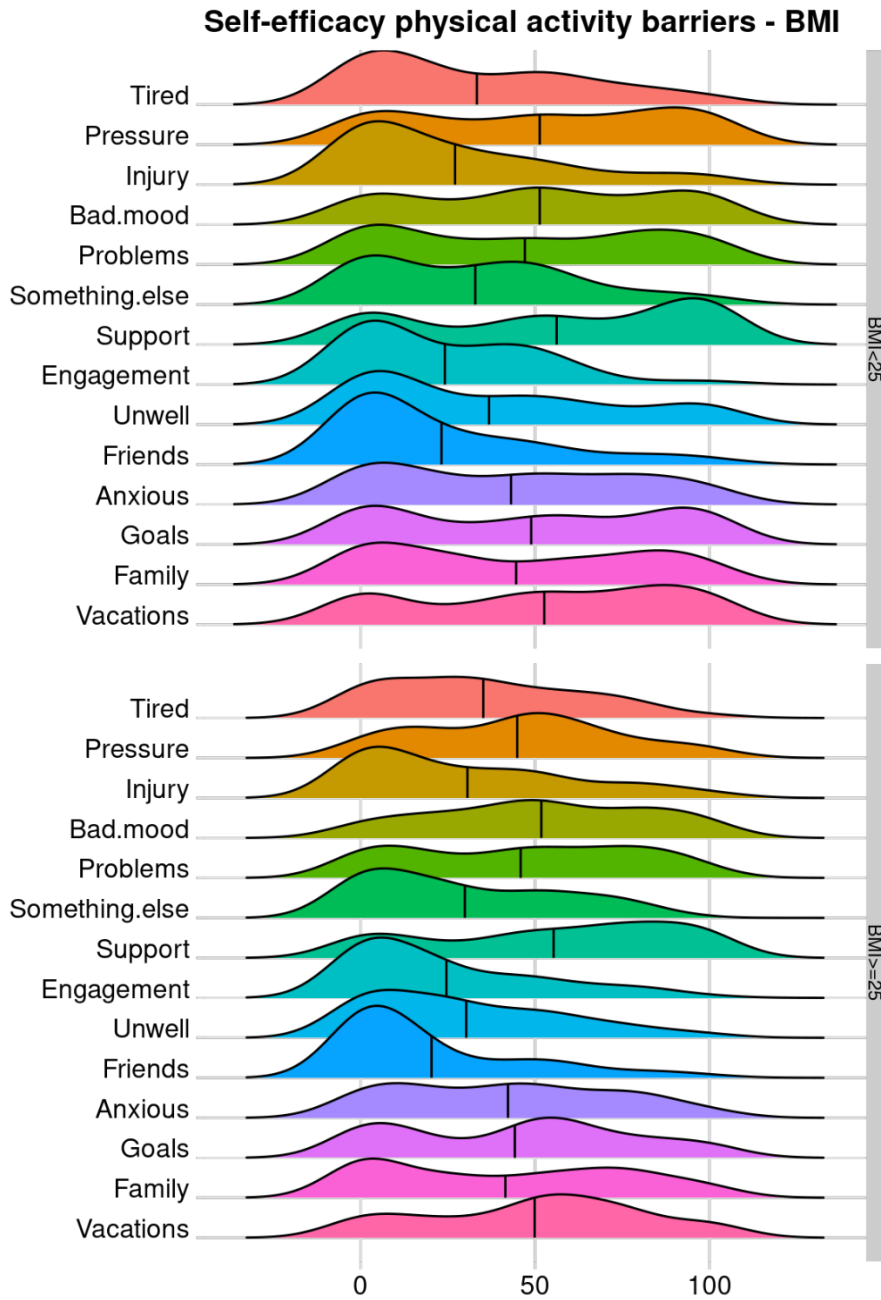

Note: BMI = Body mass index. The lower the mean indicator (vertical black line), the greater the barrier. The barriers in order from the top are: “Being tired”, “Feeling pressure at work”, “Recovering from an injury”, “Being in a bad mood”, “Having personal problems”, “Having more interesting things to do”, “Without the support of friends or family”, “Having other engagement”, “Feeling unwell”, “Having friends at home”, “Feeling anxious”, “Not reaching previously fixed training goals”, “Having family problems”, “During vacations”.

Figure S6: Self-efficacy to do physical activity when encountering barrier according to country

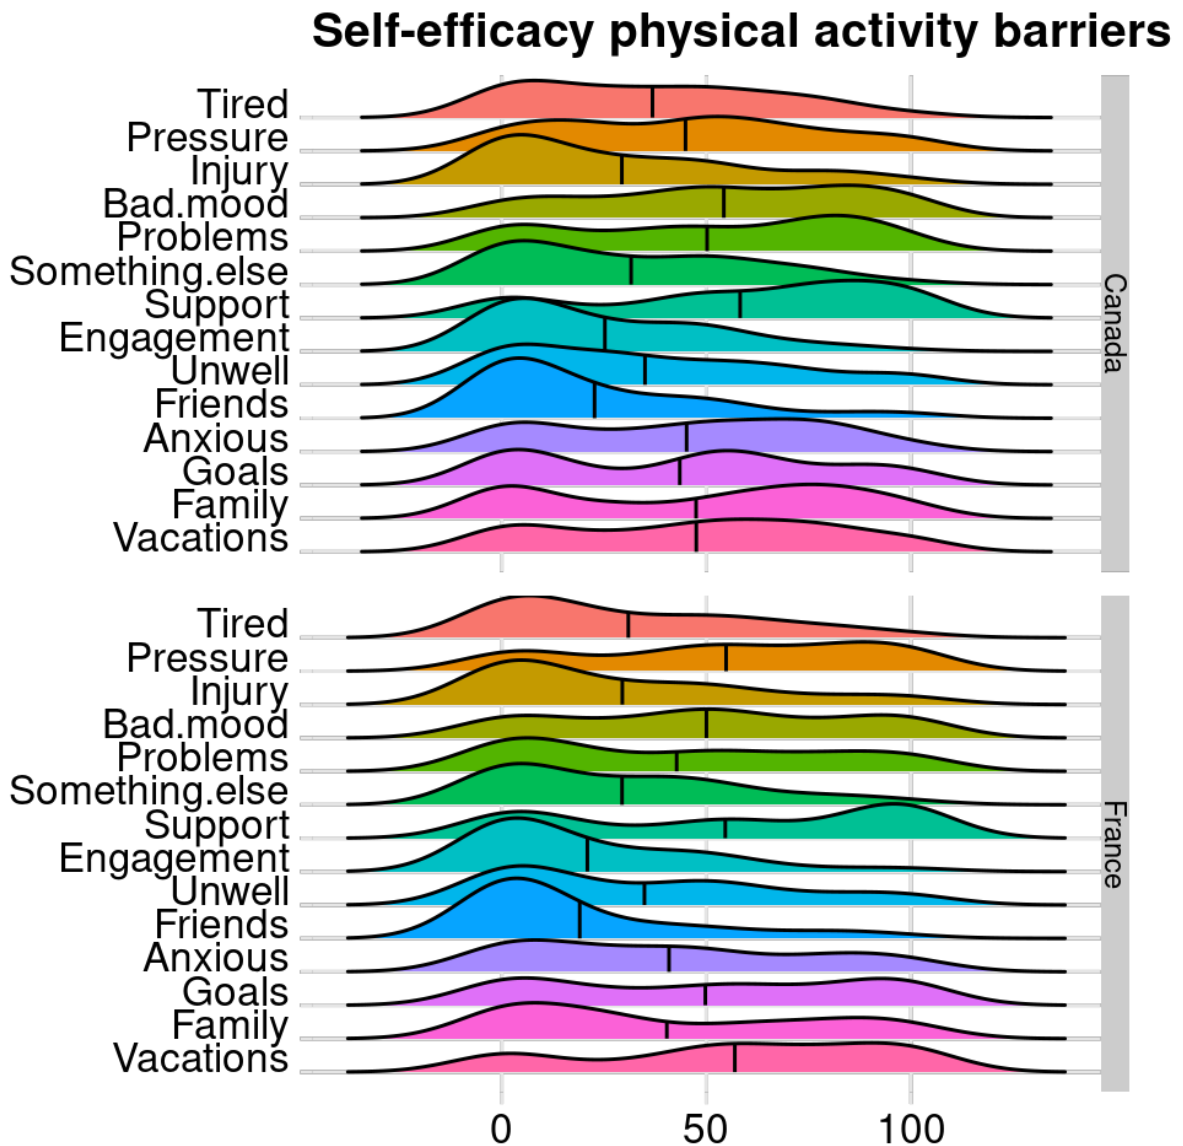

Note: The lower the mean indicator (vertical black line), the greater the barrier. The barriers in order from the top are: “Being tired”, “Feeling pressure at work”, “Recovering from an injury”, “Being in a bad mood”, “Having personal problems”, “Having more interesting things to do”, “Without the support of friends or family”, “Having other engagement”, “Feeling unwell”, “Having friends at home”, “Feeling anxious”, “Not reaching previously fixed training goals”, “Having family problems”, “During vacations”.

Figure S7: Physical activity preferences according to body mass index

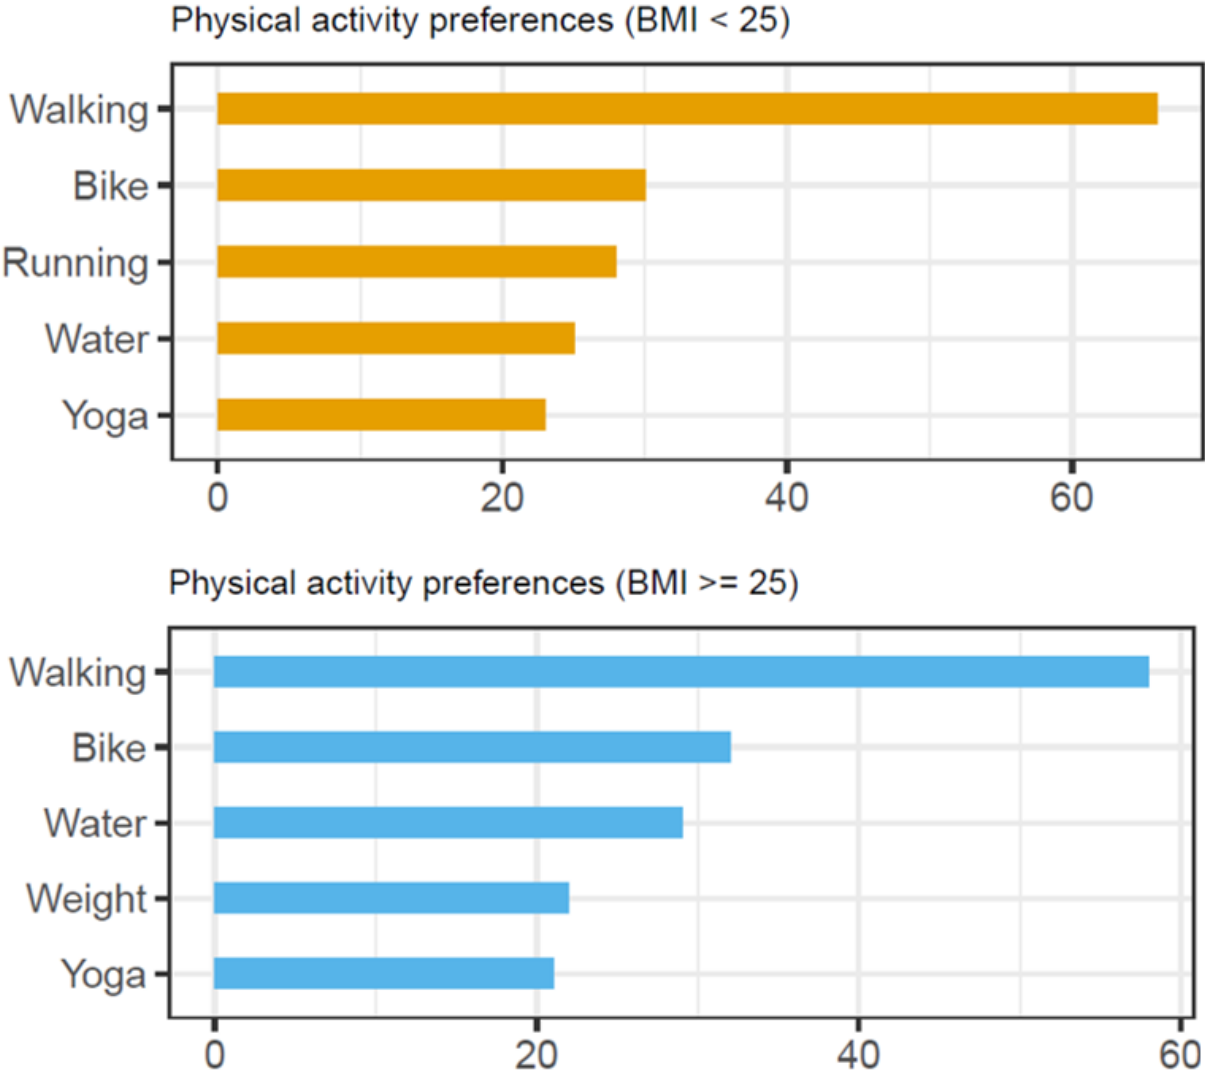



Figure S8: Physical activity preferences according to sex

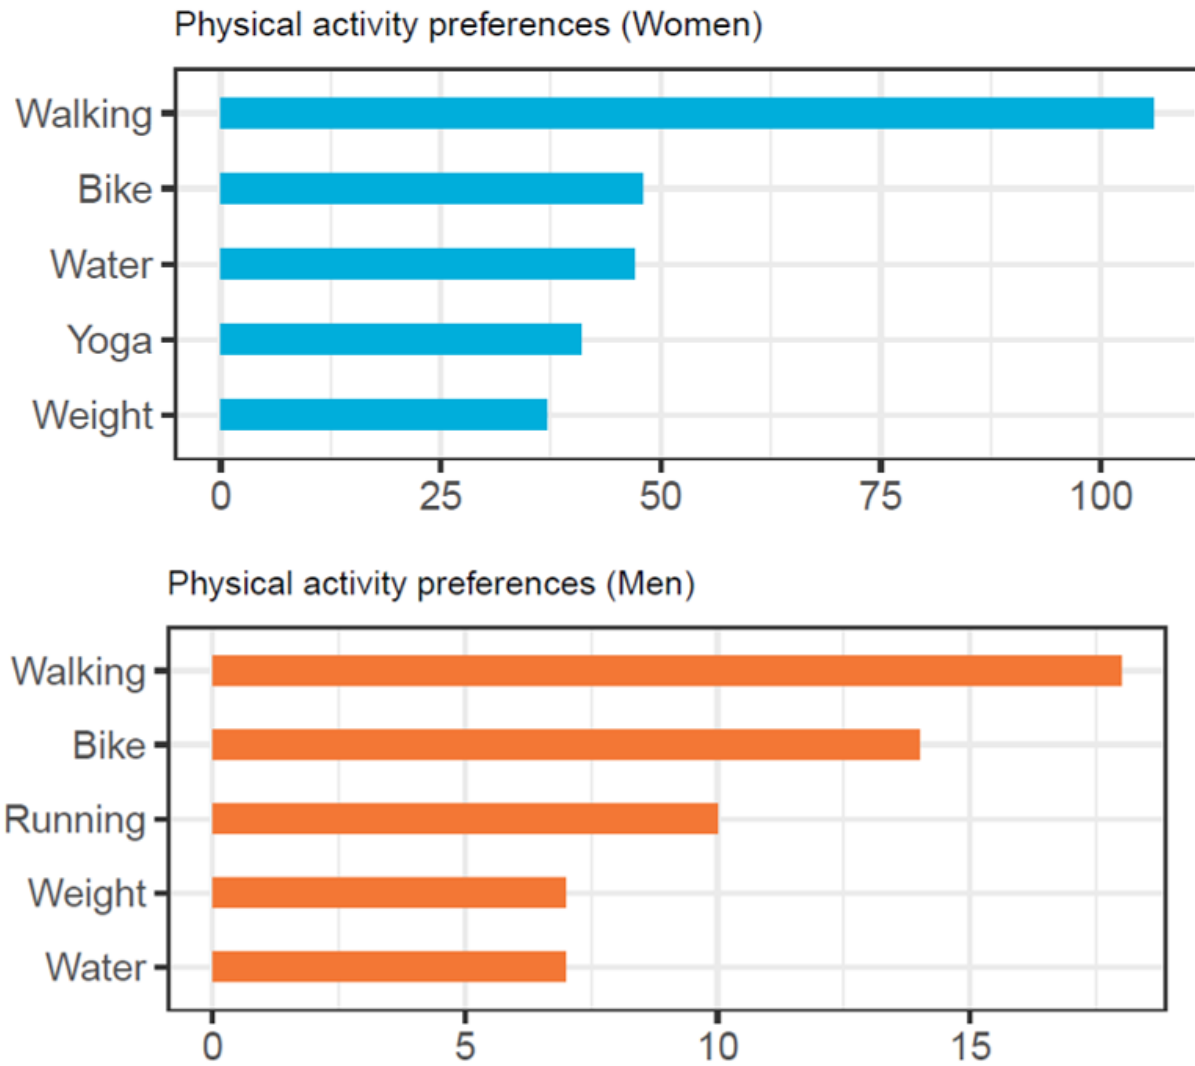

Figure S9: Physical activity preferences according to country

Physical activity preferences (France)

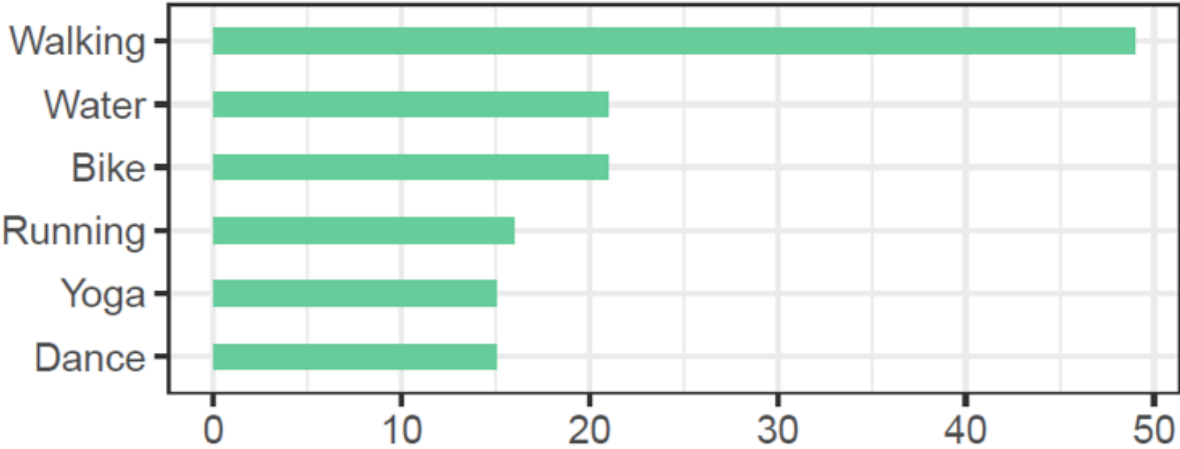

Physical activity preferences (Canada)

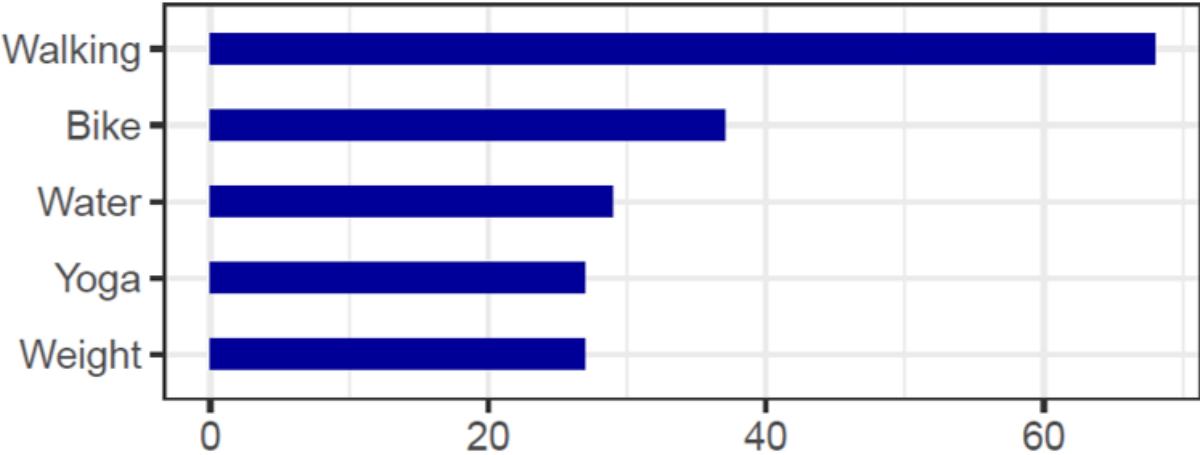

Figure S10: Physical activity preferences according to education level

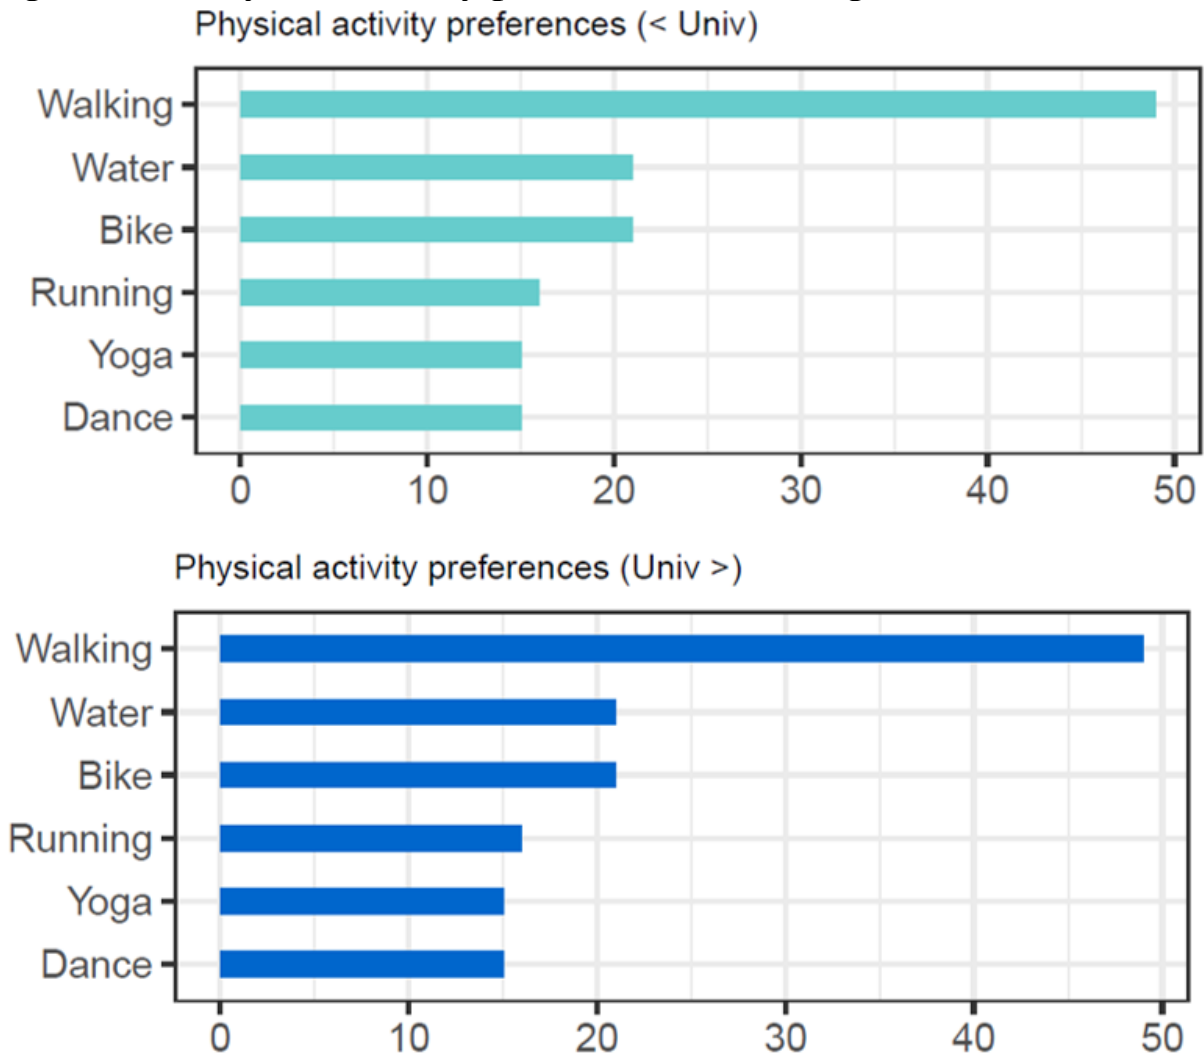

Figure S11: Physical activity preferences according to age

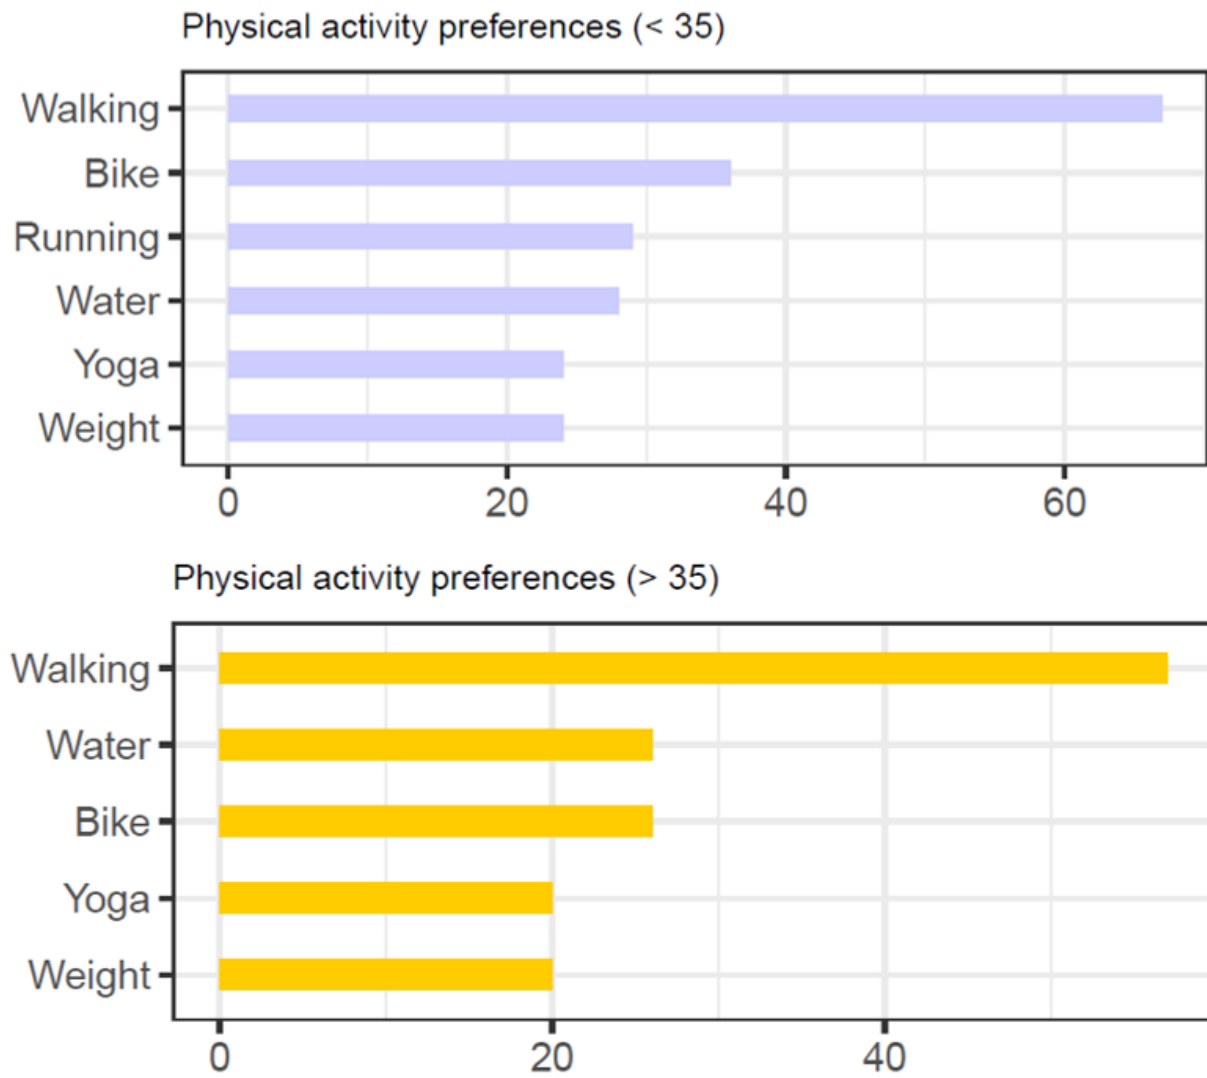

Supplement: Supplementary file [file media-1.pdf]
